# Supplementary material for: A magnetic CoFe2O4–CNS nanocomposite as an efficient, recyclable catalyst for peroxymonosulfate activation and pollutant degradation
Source: Royal Society of Chemistry journal article supplement (doi:10.1039/c7ra09665h), 2017-01-01
Supplement: c7ra09665h1.pdf [file c7ra09665h1.pdf]

*Supplementary information for*

**Magnetic CoFe<sub>2</sub>O<sub>4</sub>-CNS nanocomposite as an efficient, recyclable catalyst for peroxymonosulfate activation and pollutant degradation**

Chang-Bin Chen<sup>a,b,\*</sup>, Feng Zhang<sup>a,\*</sup>, Chen-Xuan Li<sup>a,b</sup>, Jia-Yuan Lu<sup>a</sup>, Shuo-Cui<sup>a,b</sup>,

Hou-Qi Liu<sup>a,b</sup>, Wen-Wei Li<sup>a,b,\*\*</sup>

<sup>a</sup>CAS Key Laboratory of Urban Pollutant Conversion, Department of Chemistry,  
University of Science & Technology of China, Hefei, 230026, China

<sup>b</sup> Collaborative Innovation Center of Suzhou Nano Science and Technology, Suzhou,  
215123, China

\*These authors contributed equally to this work

**\*Corresponding authors:**

Prof. Wen-Wei Li, Fax: +86 551 3607592, E-mail: [wwli@ustc.edu.cn](mailto:wwli@ustc.edu.cn);

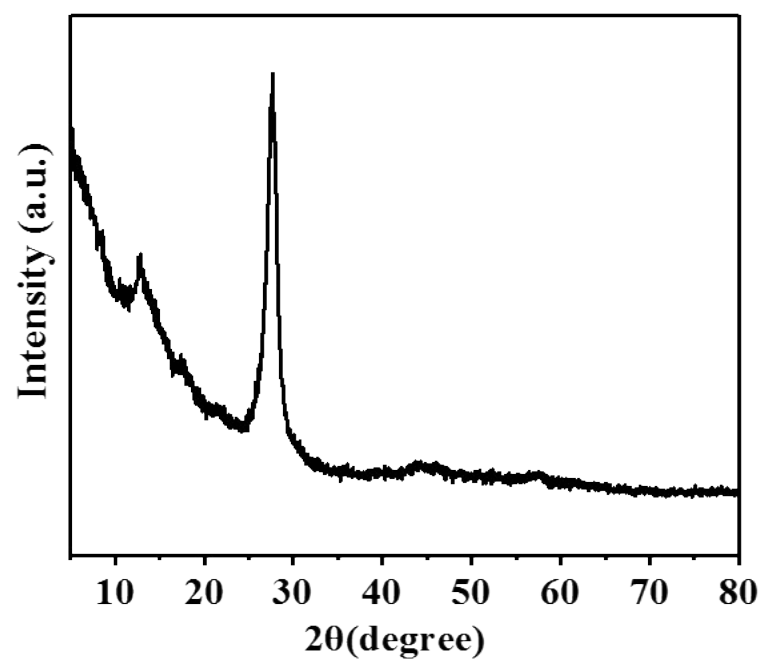

**Figure S1.** XRD patterns of g-C<sub>3</sub>N<sub>4</sub>

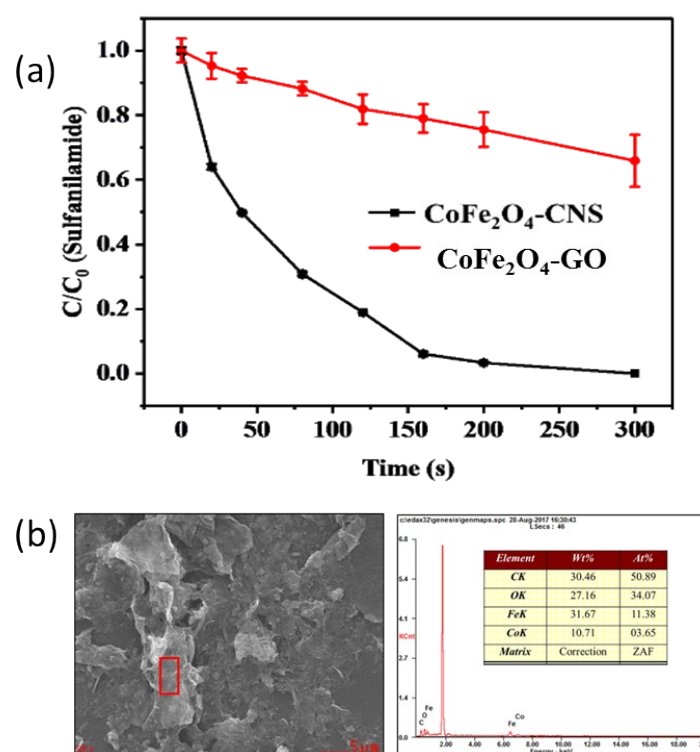

**Figure S2.** (a) Removal of SA in the reaction systems with CoFe<sub>2</sub>O<sub>4</sub>-CNS and CoFe<sub>2</sub>O<sub>4</sub>-GO catalysts; (b) SEM and EDX spectra of CoFe<sub>2</sub>O<sub>4</sub>-GO.

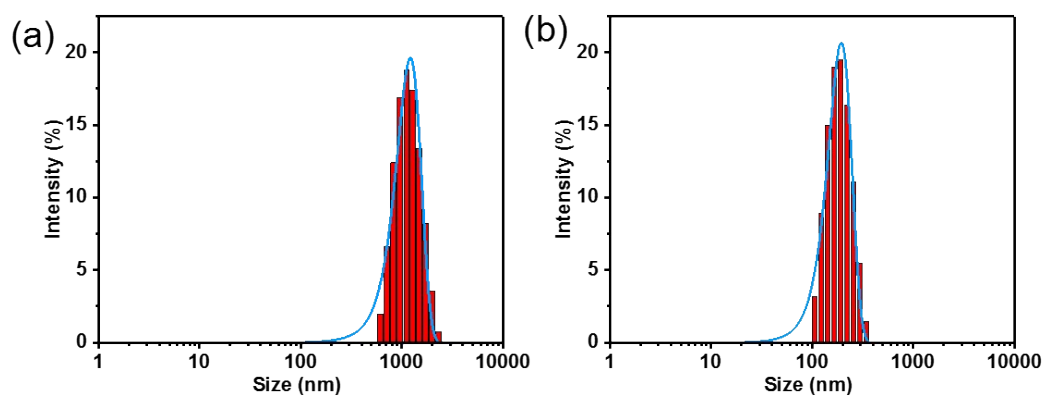

**Figure S3.** Size distribution histogram with Gaussian-fitting curve of (a) CoFe<sub>2</sub>O<sub>4</sub>-CNS and (b) CoFe<sub>2</sub>O<sub>4</sub>

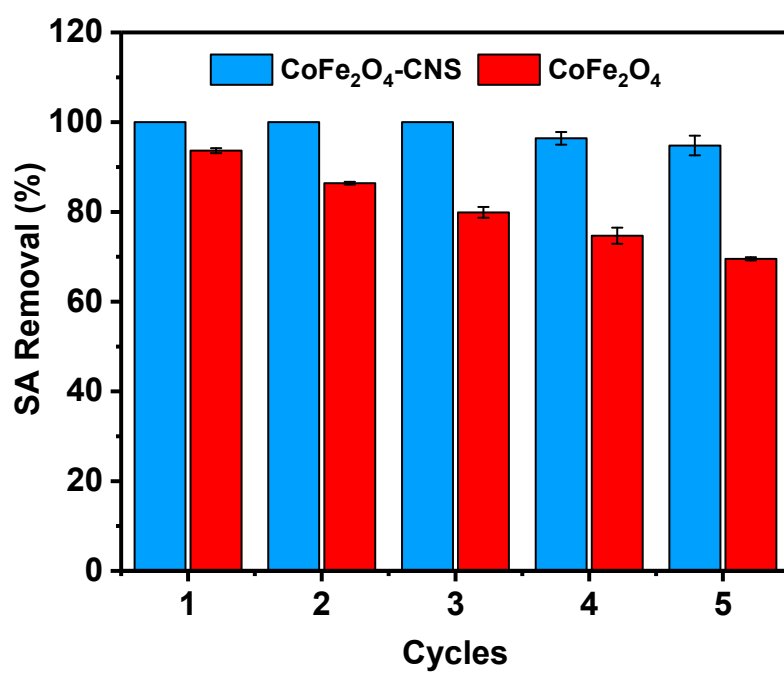

**Figure S4.** SA removal efficiencies within 30 min at five consecutive reaction cycles.

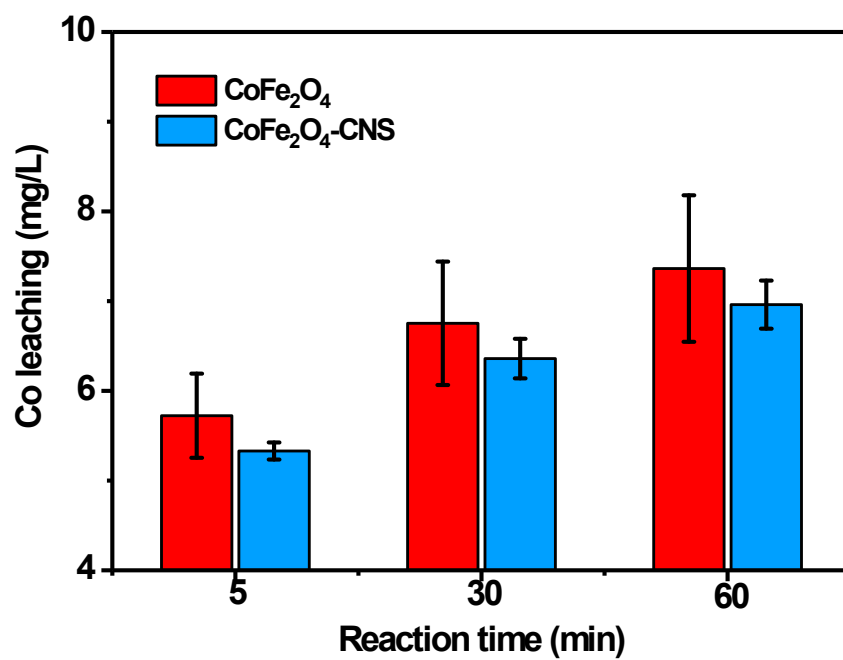

**Figure S5.** Accumulative concentrations of leached Co ions from  $\text{CoFe}_2\text{O}_4\text{-CNS}$  and  $\text{CoFe}_2\text{O}_4$ .

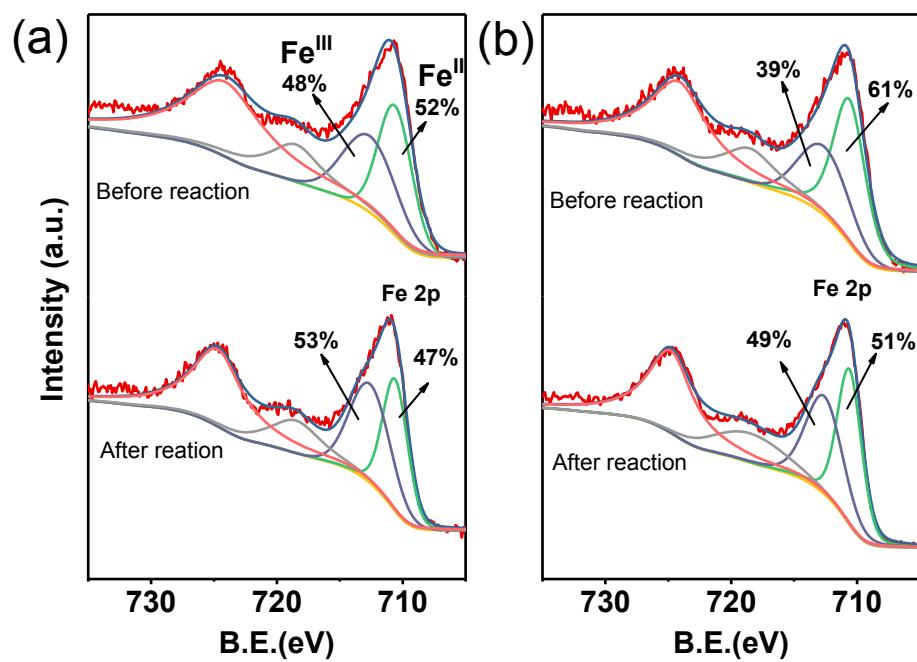

**Figure S6.** XPS of Fe 2p spectra of CoFe<sub>2</sub>O<sub>4</sub>-CNS and CoFe<sub>2</sub>O<sub>4</sub> before and after the reaction.

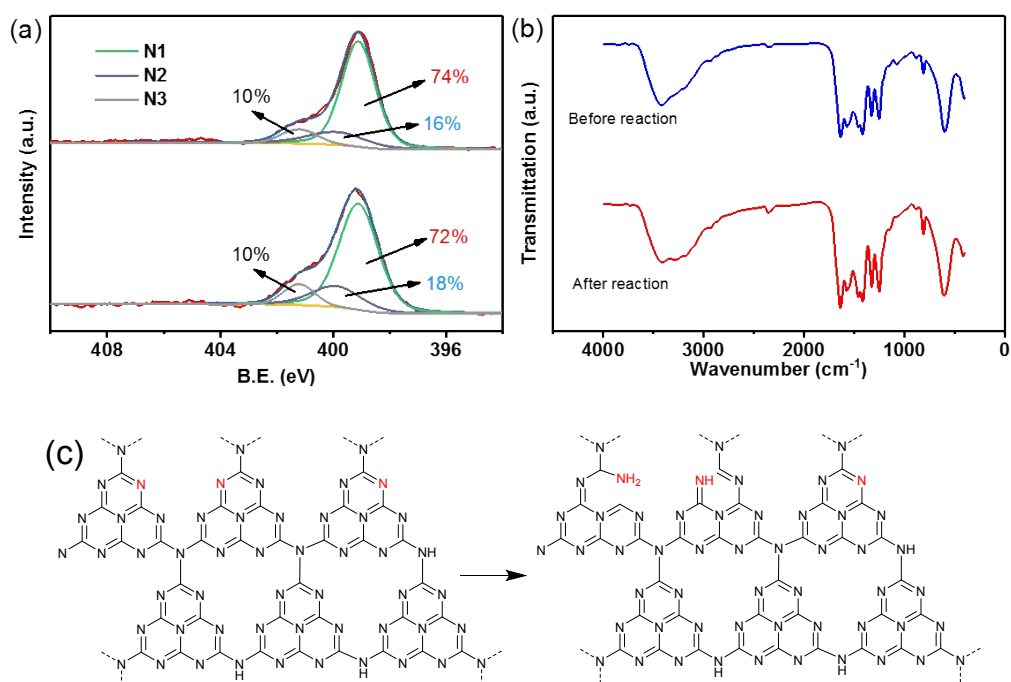

**Figure S7.** (a) High-resolution N 1s spectra of CoFe<sub>2</sub>O<sub>4</sub>-CNS. (b) FT-IR spectra of the CoFe<sub>2</sub>O<sub>4</sub>-CNS before and after the reaction with PMS. (c) The transformation of grapheme N on the zigzag edges of CNS.
